# Supplementary material for: Conformationally resolved structures of jet-cooled acetaminophen by UV–UV hole-burning spectroscopy
Source: Royal Society of Chemistry journal article supplement (doi:10.1039/c1cp21999e), 2011-01-01
Supplement: c1cp21999e.pdf [file c1cp21999e.pdf]

# Conformationally resolved structures of jet-cooled acetaminophen by UV-UV hole-burning spectroscopy

Seung Jun Lee<sup>†,a</sup>, Ahreum Min<sup>†,a</sup>, Yusic Kim<sup>†,a</sup>, Ahreum Ahn<sup>a</sup>, Jinyoung Chang<sup>b</sup>,  
Sang Hak Lee<sup>b</sup>, Myong Yong Choi<sup>\*,a</sup> and Seong Keun Kim<sup>\*,b,c</sup>

<sup>a</sup>*Department of Chemistry and Research Institute of Natural Science, Gyeongsang  
National University, Jinju 660-701, Republic of Korea*

<sup>b</sup>*Department of Chemistry, Seoul National University, Seoul 151-747, Republic of Korea*

<sup>c</sup>*WCU Department of Biophysics and Chemical Biology, Seoul National University, Seoul  
151-747, Republic of Korea*

\*Corresponding authors. E-mail address: [mychoi@gnu.ac.kr](mailto:mychoi@gnu.ac.kr) and [seongkim@snu.ac.kr](mailto:seongkim@snu.ac.kr)

<sup>†</sup> These authors contributed equally to this work.

**Keywords:** Acetaminophen (paracetamol), Conformational isomers, Resonant 2-photon  
ionization (R2PI), UV-UV hole-burning spectroscopy

**-List of contents-**

**Figure S1:** Optimized structure of *cis*- and *trans*-AAP by B3LYP/aug-cc-pVDZ

**Table S1:** Optimized structure of *cis*- (a) and *trans*-AAP (b) by B3LYP/aug-cc-pVDZ in Cartesian coordinates.

**Table S2:** A summary of the calculated values for the *cis*- and *trans*-AAP conformers at the different level of theory.

**Table S3:** Calculated vibrational frequencies and intensities of *cis*- and *trans*-AAP by B3LYP/aug-cc-pVDZ

Figure S1

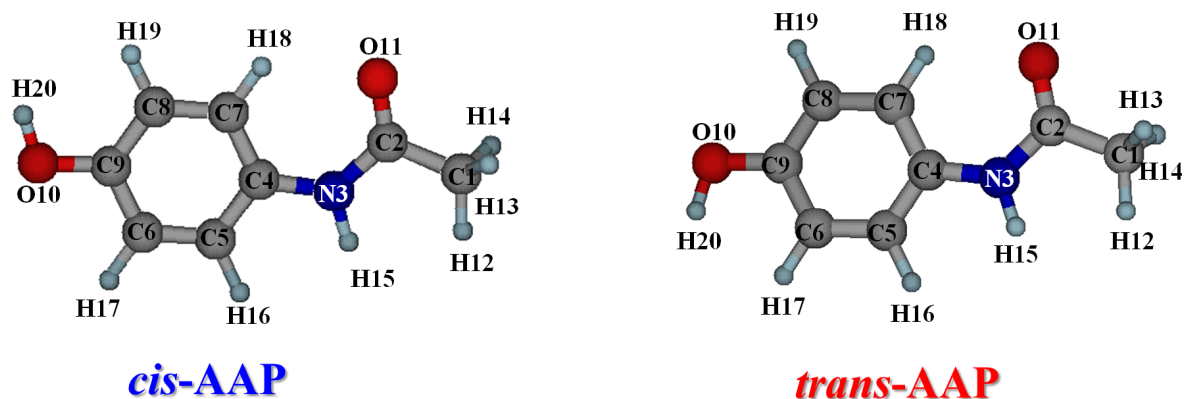

Table S1

(a) Optimized structure of *cis*-AAP by B3LYP/aug-cc-pVDZ

| Atomic Number | Coordinates (Å) |           |           |
|---------------|-----------------|-----------|-----------|
|               | X               | Y         | Z         |
| C1            | -1.365895       | -0.006289 | -3.766351 |
| C2            | -1.365762       | -0.007352 | -2.246732 |
| N3            | -0.117072       | -0.007177 | -1.670171 |
| C4            | 0.233858        | -0.002352 | -0.298413 |
| C5            | 1.602934        | -0.003488 | 0.020338  |
| C6            | 2.034815        | 0.001187  | 1.343663  |
| C7            | -0.705515       | 0.00345   | 0.74361   |
| C8            | -0.268852       | 0.008104  | 2.071749  |
| C9            | 1.094372        | 0.007047  | 2.379532  |
| O10           | 1.572323        | 0.011458  | 3.667829  |
| O11           | -2.411832       | -0.00554  | -1.608015 |
| H12           | -0.36323        | -0.038911 | -4.211429 |
| H13           | -1.883102       | 0.897405  | -4.114307 |
| H14           | -1.94298        | -0.872076 | -4.115204 |

|     |           |           |           |
|-----|-----------|-----------|-----------|
| H15 | 0.665082  | -0.009711 | -2.308979 |
| H16 | 2.346013  | -0.007958 | -0.779701 |
| H17 | 3.096756  | 0.000286  | 1.585343  |
| H18 | -1.76518  | 0.004166  | 0.511581  |
| H19 | -1.009839 | 0.012594  | 2.873934  |
| H20 | 0.832316  | 0.015258  | 4.287067  |

**(b) Optimized structure of *trans*-AAP by B3LYP/aug-cc-pVDZ**

| Atomic<br>Number | Coordinates (Å) |           |           |
|------------------|-----------------|-----------|-----------|
|                  | X               | Y         | Z         |
| C1               | -1.401345       | -0.00651  | -3.753809 |
| C2               | -1.390024       | -0.00655  | -2.234059 |
| N3               | -0.136325       | -0.006884 | -1.667436 |
| C4               | 0.227142        | -0.002274 | -0.298804 |
| C5               | 1.596375        | -0.00403  | 0.007736  |
| C6               | 2.035467        | 0.000389  | 1.331966  |
| C7               | -0.704918       | 0.003922  | 0.753389  |
| C8               | -0.262883       | 0.008318  | 2.076639  |
| C9               | 1.102823        | 0.006601  | 2.374624  |
| O10              | 1.466364        | 0.011154  | 3.699952  |
| O11              | -2.431097       | -0.004047 | -1.588008 |
| H12              | -0.402013       | -0.035406 | -4.206638 |
| H13              | -1.924981       | 0.894731  | -4.098379 |
| H14              | -1.977505       | -0.874911 | -4.097724 |
| H15              | 0.639861        | -0.009971 | -2.313394 |
| H16              | 2.334905        | -0.008822 | -0.796432 |
| H17              | 3.105752        | -0.001051 | 1.547513  |
| H18              | -1.765963       | 0.005156  | 0.527894  |
| H19              | -0.982128       | 0.013121  | 2.894779  |
| H20              | 2.428396        | 0.009299  | 3.772781  |

**Table S2**

| <b>AAP</b>    | <b>Method<br/>Basis set</b>  | <b>Energy<br/>(Hartree)</b> | <b>Relative<br/>Energy<br/>(kJ/mol)</b> | <b>Dipole<br/>moment<br/>(D)</b> | <b>Rotational<br/>constants<br/>(GHz)</b> |                |
|---------------|------------------------------|-----------------------------|-----------------------------------------|----------------------------------|-------------------------------------------|----------------|
| <b>cis-</b>   | <b>B3LYP<br/>aug-cc-pVDZ</b> | <b>-515.4001</b>            | <b>0</b>                                | <b>2.30</b>                      | <b>A</b>                                  | <b>3.60164</b> |
|               |                              |                             |                                         |                                  | <b>B</b>                                  | <b>0.54143</b> |
|               |                              |                             |                                         |                                  | <b>C</b>                                  | <b>0.47206</b> |
| <b>trans-</b> | <b>B3LYP<br/>aug-cc-pVDZ</b> | <b>-515.3996</b>            | <b>1.37</b>                             | <b>4.77</b>                      | <b>A</b>                                  | <b>3.59636</b> |
|               |                              |                             |                                         |                                  | <b>B</b>                                  | <b>0.54161</b> |
|               |                              |                             |                                         |                                  | <b>C</b>                                  | <b>0.47211</b> |
| <b>cis-</b>   | <b>MP2<br/>aug-cc-pVDZ</b>   | <b>-513.9441</b>            | <b>0</b>                                | <b>2.24</b>                      | <b>A</b>                                  | <b>3.55707</b> |
|               |                              |                             |                                         |                                  | <b>B</b>                                  | <b>0.53997</b> |
|               |                              |                             |                                         |                                  | <b>C</b>                                  | <b>0.4702</b>  |
| <b>trans-</b> | <b>MP2<br/>aug-cc-pVDZ</b>   | <b>-513.9436</b>            | <b>1.41</b>                             | <b>4.71</b>                      | <b>A</b>                                  | <b>3.54876</b> |
|               |                              |                             |                                         |                                  | <b>B</b>                                  | <b>0.54024</b> |
|               |                              |                             |                                         |                                  | <b>C</b>                                  | <b>0.47025</b> |

**Table S3**

| <b>cis-AAP</b>                     |                               |                                    |                               | <b>trans-AAP</b>                   |                               |                                    |                               |
|------------------------------------|-------------------------------|------------------------------------|-------------------------------|------------------------------------|-------------------------------|------------------------------------|-------------------------------|
| <b>Harmonic</b>                    |                               | <b>Harmonic</b>                    |                               | <b>Harmonic</b>                    |                               | <b>Harmonic</b>                    |                               |
| <b>Freq.<br/>(cm<sup>-1</sup>)</b> | <b>Intensity<br/>(km/mol)</b> | <b>Freq.<br/>(cm<sup>-1</sup>)</b> | <b>Intensity<br/>(km/mol)</b> | <b>Freq.<br/>(cm<sup>-1</sup>)</b> | <b>Intensity<br/>(km/mol)</b> | <b>Freq.<br/>(cm<sup>-1</sup>)</b> | <b>Intensity<br/>(km/mol)</b> |
| 3817.8                             | 72.4                          | 1019.9                             | 4.2                           | 3819.2                             | 73.3                          | 1019.5                             | 4.0                           |
| 3623.0                             | 19.6                          | 1006.1                             | 13.8                          | 3623.2                             | 18.7                          | 1005.7                             | 15.2                          |
| 3254.2                             | 7.4                           | 989.0                              | 1.1                           | 3255.0                             | 7.5                           | 1003.9                             | 0.5                           |
| 3203.2                             | 4.4                           | 967.5                              | 0.0                           | 3199.4                             | 4.0                           | 963.6                              | 3.7                           |
| 3164.4                             | 2.9                           | 962.8                              | 0.8                           | 3174.1                             | 11.8                          | 945.9                              | 0.1                           |
| 3162.5                             | 27.2                          | 865.0                              | 5.2                           | 3157.7                             | 18.7                          | 864.9                              | 43.0                          |
| 3127.7                             | 8.4                           | 853.1                              | 58.7                          | 3127.4                             | 7.7                           | 863.0                              | 3.9                           |

|        |       |       |      |        |       |       |      |
|--------|-------|-------|------|--------|-------|-------|------|
| 3124.1 | 12.1  | 820.6 | 1.4  | 3124.2 | 13.0  | 809.2 | 18.8 |
| 3044.3 | 11.2  | 797.9 | 19.9 | 3044.2 | 11.3  | 797.0 | 24.0 |
| 1732.3 | 252.6 | 740.2 | 0.0  | 1734.0 | 257.1 | 738.5 | 0.0  |
| 1659.9 | 9.9   | 653.2 | 0.0  | 1662.7 | 2.0   | 653.3 | 1.8  |
| 1644.5 | 6.5   | 627.8 | 8.2  | 1639.8 | 38.4  | 627.3 | 4.4  |
| 1554.7 | 379.2 | 626.1 | 3.3  | 1557.5 | 403.1 | 626.0 | 6.4  |
| 1536.2 | 266.4 | 550.4 | 39.0 | 1531.8 | 104.5 | 549.0 | 38.6 |
| 1465.4 | 6.7   | 529.8 | 31.0 | 1465.9 | 37.8  | 529.1 | 31.8 |
| 1446.6 | 27.4  | 503.9 | 24.8 | 1449.4 | 134.0 | 503.7 | 26.0 |
| 1443.9 | 7.6   | 428.4 | 0.3  | 1443.8 | 7.3   | 427.7 | 0.7  |
| 1379.2 | 29.2  | 425.6 | 9.2  | 1378.8 | 66.8  | 425.1 | 7.4  |
| 1370.3 | 13.6  | 381.8 | 0.2  | 1370.1 | 45.0  | 381.3 | 0.1  |
| 1334.5 | 70.9  | 354.2 | 96.3 | 1330.0 | 23.0  | 338.4 | 95.3 |
| 1282.0 | 20.6  | 325.3 | 1.0  | 1283.3 | 20.0  | 324.2 | 3.3  |
| 1253.6 | 216.0 | 312.1 | 0.0  | 1255.1 | 170.9 | 312.5 | 4.9  |
| 1235.9 | 15.5  | 188.4 | 0.0  | 1234.7 | 16.6  | 187.8 | 0.0  |
| 1189.7 | 103.7 | 153.6 | 8.9  | 1187.8 | 184.3 | 153.8 | 4.1  |
| 1182.9 | 70.2  | 81.5  | 1.5  | 1186.4 | 1.1   | 81.1  | 1.3  |
| 1124.6 | 26.3  | 52.8  | 7.7  | 1125.8 | 11.3  | 50.6  | 2.8  |
| 1035.1 | 4.8   | 39.3  | 1.6  | 1034.8 | 4.8   | 38.6  | 1.7  |
